# Supplementary material
Source: publisher figshare collection journal article supplement (https://springernature.figshare.com/ndownloader/files/13697852)

## Genome completeness

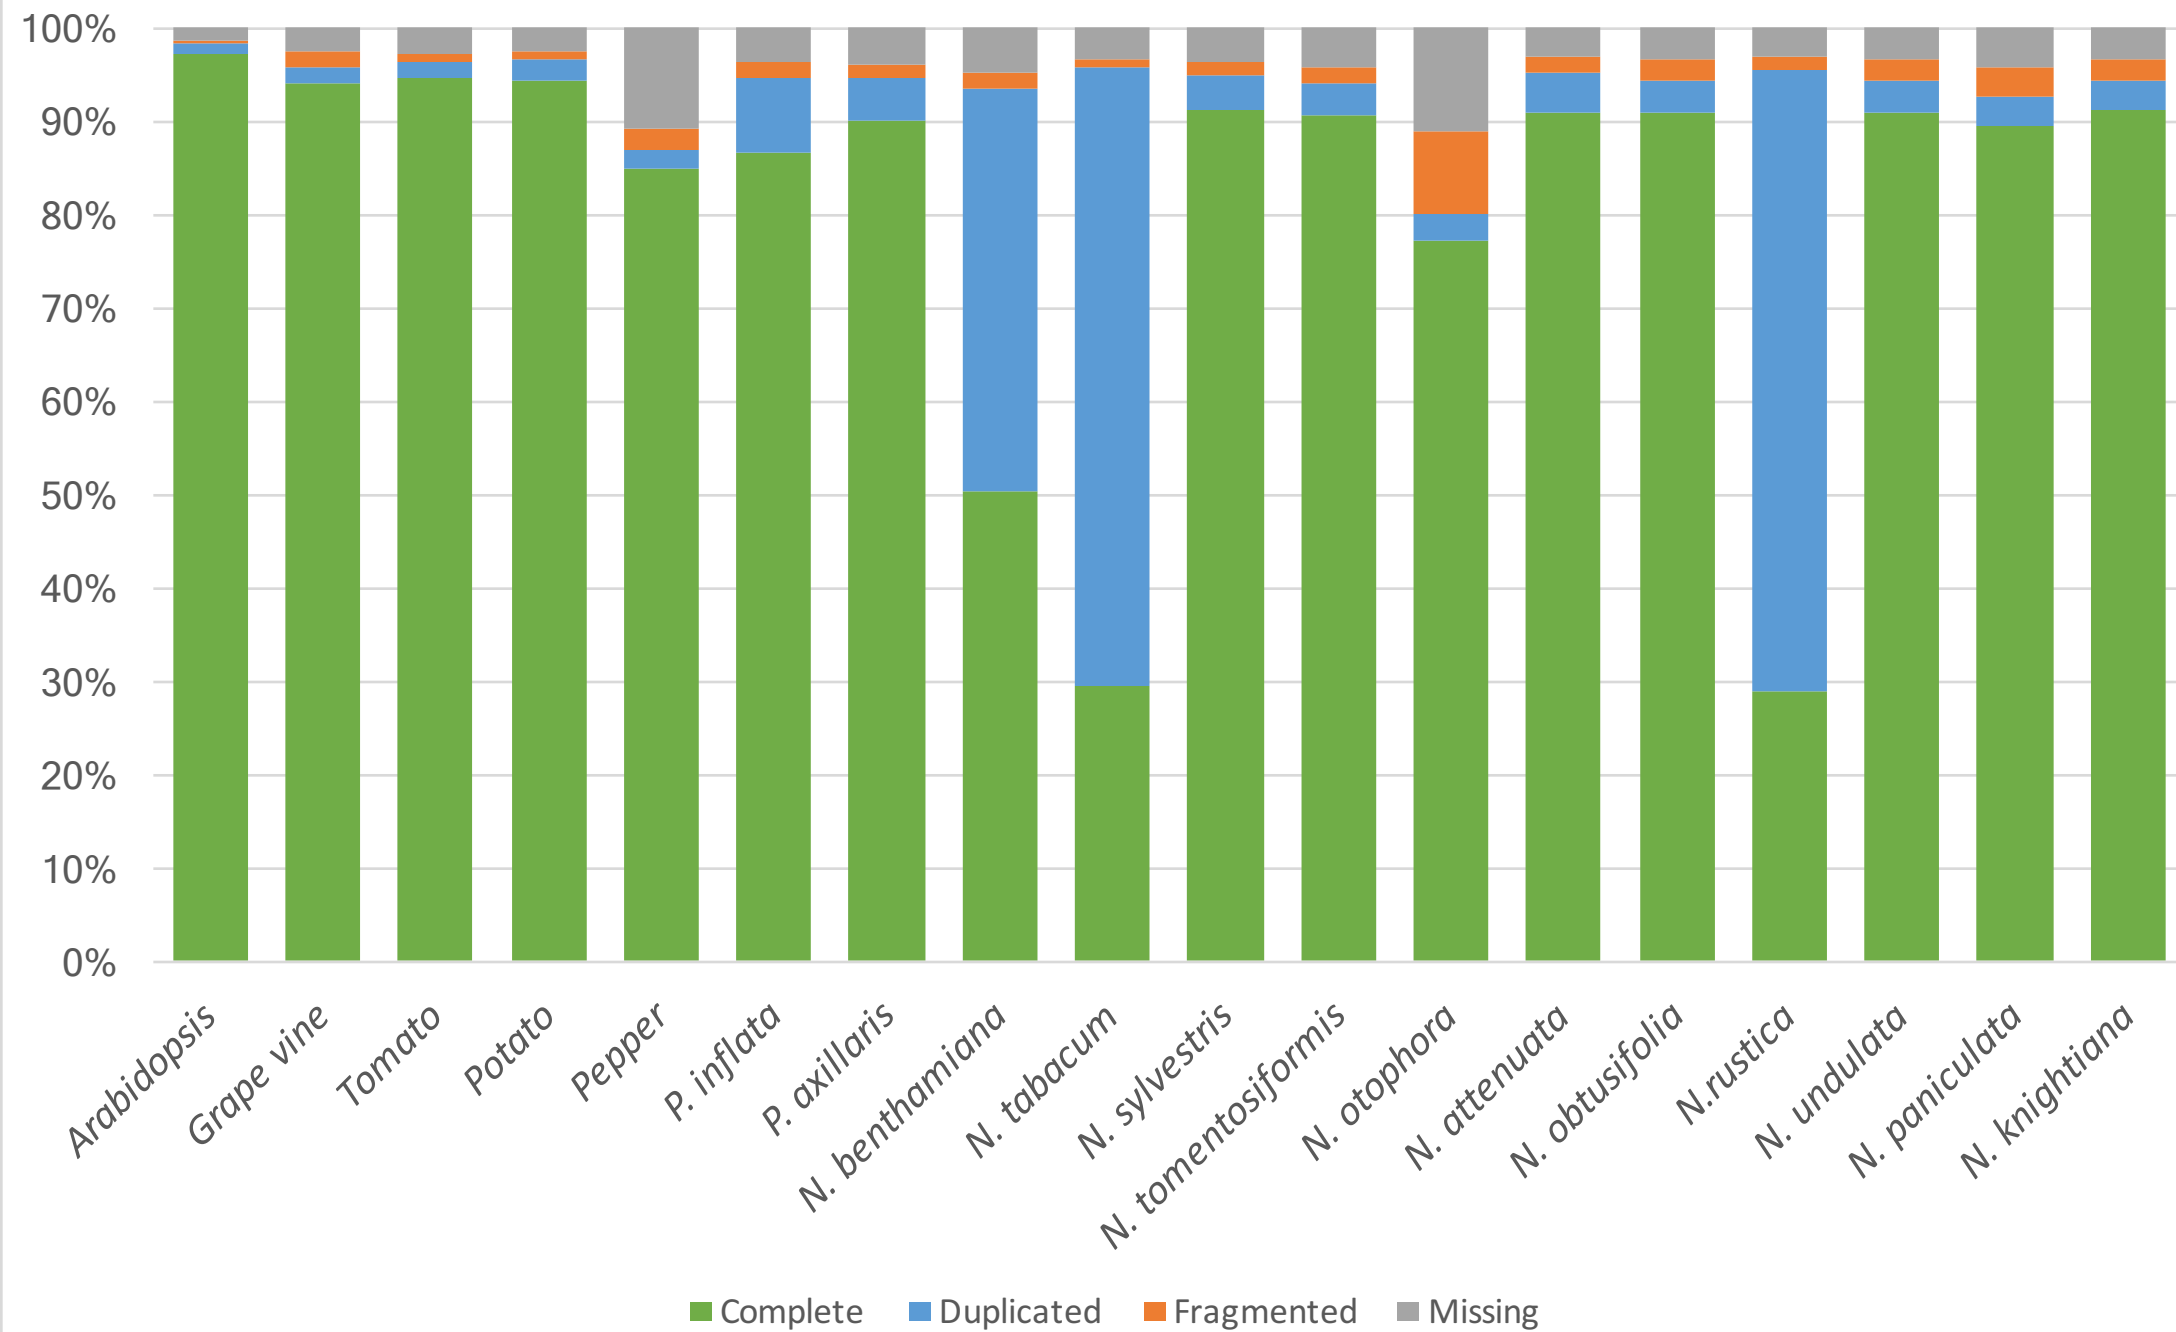

Supplement: Supplementary file [file 13697852]
